# Supplementary material for: Life Cycle Assessment of Existing and Alternative Options for Municipal Solid Waste Management in Saint Petersburg and the Leningrad Region, Russia
Source: MDPI journal article supplement (doi:10.3390/recycling7020019), 2022-03-14
Supplement: s1 [file s1]

## **Supplementary material for**

# **“Life cycle assessment of existing and alternative options for municipal solid waste management in Saint Petersburg and Leningrad region, Russia”**

Anna Zaikova<sup>1,\*</sup>, Natalia Vinitskaia<sup>1</sup>, Ivan Deviatkin<sup>1</sup>, Jouni Havukainen<sup>1</sup>, Mika Horttanainen<sup>1</sup>

<sup>1</sup> Lappeenranta-Lahti University of Technology LUT, Sustainability Science. P.O. Box 20, FI-53851, Lappeenranta, Finland

\*Corresponding author: Anna Zaikova, Sustainability Science,

Lappeenranta University of Technology, P.O. Box 20, 53851

Lappeenranta, Finland

E-mail: [anna.zaikova@lut.fi](mailto:anna.zaikova@lut.fi)

## Table of contents

|     |                                                                              |    |
|-----|------------------------------------------------------------------------------|----|
| 1   | Reform of MSW management in Saint Petersburg and the Leningrad region.....   | 5  |
| 2   | Inventory data .....                                                         | 6  |
| 2.1 | Waste collection and transportation.....                                     | 6  |
| 2.2 | Landfilling .....                                                            | 9  |
| 2.3 | Data on MSW sorting facilities .....                                         | 11 |
| 2.4 | MSW sorting processes.....                                                   | 12 |
| 2.5 | Composting of organic fraction .....                                         | 14 |
| 2.6 | Anaerobic digestion of organic fraction .....                                | 16 |
| 2.7 | Recycling processes .....                                                    | 17 |
| 2.8 | Incineration of mixed MSW .....                                              | 18 |
| 2.9 | RDF incineration.....                                                        | 19 |
| 3   | Sensitivity analysis .....                                                   | 21 |
| 3.1 | Perturbation analysis.....                                                   | 21 |
| 3.2 | Impact of modelling choices: alternative data .....                          | 22 |
| 4   | Results .....                                                                | 23 |
| 4.1 | Perturbation analysis: sensitivity ratios .....                              | 23 |
| 4.2 | Perturbation analysis: normalized sensitivity ratios .....                   | 25 |
| 4.3 | Specific net impact potentials of processes involved in MSW management ..... | 28 |
| 4.4 | Life cycle impact assessment results .....                                   | 30 |
|     | References .....                                                             | 32 |

## Abbreviations

|                  |                                            |
|------------------|--------------------------------------------|
| AD               | Anaerobic Digestion                        |
| ADP <sub>f</sub> | Abiotic Depletion Potential (fossil fuels) |
| AP               | Acidification Potential                    |
| APC              | Air Pollution Control                      |
| DOC              | Degradable Organic Carbon                  |
| EP               | Eutrophication Potential                   |
| GWP              | Global Warming Potential                   |
| HDPE             | High-density Polyethylene                  |
| LCA              | Life Cycle Assessment                      |
| LCI              | Life Cycle Inventory                       |
| LCIA             | Life Cycle Impact Assessment               |
| LFG              | Landfill Gas                               |
| MCF              | Methane Correction Factor                  |
| MSW              | Municipal Solid Waste                      |
| NMVOC            | Non-methane Volatile Organic Compounds     |
| NSR              | Normalized Sensitivity Ratio               |
| PET              | Polyethylene Terephthalate                 |
| RDF              | Refuse Derived Fuel                        |
| SR               | Sensitivity Ratio                          |
| SNCR             | Selective Non-Catalytic Reduction          |

## **1 Reform of MSW management in Saint Petersburg and the Leningrad region**

Reform of the waste management system in Saint Petersburg and the Leningrad region, as in the rest of Russia, was started in 2017-2019. In terms of waste handling practices, the reform aims to increase the amount of MSW sent to sorting and for utilization (meaning mainly material and energy recovery) and eliminate unauthorized dumps [85]. To facilitate increased rates of MSW sorting and utilization, additional capacity for waste sorting has been planned in each region.

Thus far, the federal city of Saint Petersburg and the Leningrad region have developed separate reform plans despite their closely linked MSW management systems. Existing MSW management systems and targeted developments are currently described in regional waste management plans drafted by the Waste Management Committee of the Leningrad Region [35] and the Committee for the Improvement of Saint Petersburg [41]. New facilities are planned in the Leningrad region to cover the needs of both areas. Those installations include waste sorting facilities in the towns of Gatchina and Kingisepp. At the same time, the plan for Saint Petersburg includes an expansion of the MPBO-2 plant, which would allow the waste treatment targets to be reached independently. It would appear that, according to current planning documents, there is some overlapping of plans for additional sorting capacity.

In this study, the development of the infrastructure planned in the Leningrad region is considered in preference to infrastructural changes planned in Saint Petersburg. Such a choice is determined by criticism of the MPBO-2 sorting plant expansion in Saint Petersburg [86], as well as lower availability of data on technologies being proposed for this plant.

## 2 Inventory data

### 2.1 Waste collection and transportation

**Table S1. LCI data on waste collection and transportation in Saint Petersburg**

| District         | MSW generation, share [41] | Distances, km <sup>1</sup>            |                                                |                                       |     |
|------------------|----------------------------|---------------------------------------|------------------------------------------------|---------------------------------------|-----|
|                  |                            | Districts-> sorting/transfer stations | Sorting/transfer stations-> incineration plant | Sorting/transfer stations-> landfills |     |
| Vyborgsky        | 0.08                       | MPBO-2                                | 30                                             | 65                                    | 25  |
| Kalininsky       | 0.13                       |                                       | 20                                             |                                       |     |
| Krasnogvardeisky | 0.05                       |                                       | 10                                             |                                       |     |
| Kronstadt        | 0.01                       |                                       | 60                                             |                                       |     |
| Kurortny         | 0.02                       |                                       | 70                                             |                                       |     |
| Nevsky           | 0.08                       |                                       | 15                                             |                                       |     |
| Petrogradsky     | 0.03                       |                                       | 25                                             |                                       |     |
| Primorsky        | 0.06                       |                                       | 40                                             |                                       |     |
| Tsentralny       | 0.06                       |                                       | 15                                             |                                       |     |
| Admiralteysky    | 0.04                       | Staroobryadcheskaya                   | 5                                              | 45                                    | 40  |
| Vastleostrovsky  | 0.05                       |                                       | 15                                             |                                       |     |
| Kirovsky         | 0.08                       |                                       | 15                                             |                                       |     |
| Frunzensky       | 0.07                       |                                       | 15                                             |                                       |     |
| Kolpinsky        | 0.04                       | Sinergiya                             | 5                                              |                                       | 50  |
| Krasnoselsky     | 0.08                       | Predportovaya                         | 10                                             | 40                                    | 120 |
| Moskovsky        | 0.06                       |                                       | 10                                             |                                       |     |
| Petrodvortsovy   | 0.03                       |                                       | 35                                             |                                       |     |
| Pushkinsky       | 0.03                       | TEK                                   | 20                                             | 35                                    | 115 |

<sup>1</sup> Numbers are rounded up to nearest 5

Collection and transportation are modelled using unit processes from GaBi database: “GLO: Truck, Euro 5, 12 - 14t gross weight / 9,3t payload capacity” (in-city collection of MSW in Saint Petersburg) and “GLO: Truck-trailer, Euro 5, 28 - 34t gross weight / 22t payload capacity” (transportation of MSW from transfer stations and sorting facilities in Saint Petersburg and waste collection and transportation in the Leningrad region).

**Table S2. LCI data on waste collection and transportation in the Leningrad region**

| District      | MSW generation, share [35] | Distances, km <sup>1</sup>            |                                                |                                       |    |
|---------------|----------------------------|---------------------------------------|------------------------------------------------|---------------------------------------|----|
|               |                            | Districts-> sorting/transfer stations | Sorting/transfer stations-> incineration plant | Sorting/transfer stations-> landfills |    |
| Podporozhsky  | 0.02                       | Kostsept EKO                          | 60                                             |                                       | 90 |
| Lodeynopolsky | 0.02                       |                                       | 15                                             |                                       |    |
| Kingisepp     | 0.04                       | Kingisepp plant                       | 10                                             | 50                                    | 0  |
| Sosnovoborsky | 0.04                       |                                       | 65                                             |                                       |    |
| Priozersky    | 0.03                       | Traktornoe plant                      | 30                                             |                                       | 0  |
| Slantsevsky   | 0.02                       | Slantsi plant                         | 20                                             | 65                                    | 0  |
| Volkhovsky    | 0.02                       | Kuti plant                            | 35                                             | 75                                    | 0  |
| Kirishsky     | 0.04                       | Lel' EKO                              | 10                                             |                                       | 80 |
| Vsevolozhsky  | 0.20                       | Lepsari plant                         | 25                                             |                                       | 40 |
| Volosovsky    | 0.02                       | Profspetstrans                        | 20                                             |                                       | 65 |
| Vyborgsky     | 0.12                       | SadServis                             | 90                                             |                                       | 85 |
| Boksitogorsky | 0.02                       | -                                     | -                                              |                                       | 15 |
| Gatchinsky    | 0.14                       | Gatchina plant                        | 5                                              | 30                                    | 5  |
| Kirovsky      | 0.07                       | -                                     | -                                              |                                       | 35 |
| Lomonosovsky  | 0.04                       | -                                     | -                                              | 40                                    | 60 |
| Lugsky        | 0.04                       | -                                     | -                                              |                                       | 40 |
| Tikhvinsky    | 0.04                       | -                                     | -                                              |                                       | 15 |
| Tosnensky     | 0.06                       | -                                     | -                                              |                                       | 25 |

<sup>1</sup> Numbers are rounded up to nearest 5

All trucks are diesel-driven; diesel supply is modeled using “RU: Diesel mix at filling station (100% fossil)” unit process.

**Table S3. LCI data on transportation of recyclable materials**

| Sorting stations    | Distances to recycling facilities, km <sup>1</sup> |       |                     |       |     |      |
|---------------------|----------------------------------------------------|-------|---------------------|-------|-----|------|
|                     | Aluminum                                           | Steel | Paper,<br>cardboard | Glass | PET | HDPE |
| MPBO-2              | 20                                                 | 500   | 180                 | 520   | 45  | 680  |
| Staroobryadcheskaya | 25                                                 |       |                     |       |     |      |
| Sinergiya           | 20                                                 |       |                     |       |     |      |
| Predportovaya       | 10                                                 |       |                     |       |     |      |
| TEK                 | 20                                                 |       |                     |       |     |      |
| Gatchina plant      | 45                                                 |       |                     |       |     |      |
| Kingisepp plant     | 130                                                |       | 240                 |       | 135 |      |
| Traktornoe plant    |                                                    |       |                     |       |     |      |
| Kuti plant          |                                                    |       |                     |       |     |      |
| Lel' EKO            |                                                    |       |                     |       |     |      |
| Kontsept EKO        | 125                                                |       | 190                 |       | 130 |      |
| Slantsi plant       |                                                    |       |                     |       |     |      |
| Lepsari plant       |                                                    |       |                     |       |     |      |
| Profspetstrans      |                                                    |       |                     |       |     |      |
| SadServis           |                                                    |       |                     |       |     |      |

<sup>1</sup> Numbers are rounded up to nearest 5

## 2.2 Landfilling

Only methane emissions are considered in LFG emissions. Methane generation potential ( $\text{kg}_{\text{CH}_4}/\text{kg}_{\text{waste}}$ ) of waste decomposition is calculated based IPCC default model [42] using the equation:

$$L_0 = DOC \times DOC_f \times MCF \times F \times \frac{16}{12},$$

where  $DOC$  – degradable organic carbon,  $\text{kg}_C/\text{kg}_{\text{waste}}$ ,

$DOC_f$  – share of degradable organic carbon degraded,

$MCF$  –  $\text{CH}_4$  correction factor, share,

$F$  – a fraction of  $\text{CH}_4$  in landfill gas, share,

$\frac{16}{12}$  – correlation between carbon and methane content.

**Table S4. LCI data on landfilling**

| Parameter                                                        | Value | Unit                                   | Reference |
|------------------------------------------------------------------|-------|----------------------------------------|-----------|
| $\text{CH}_4$ oxidation factor                                   | 0.1   | share                                  | [42]      |
| $\text{CH}_4$ correction factor                                  | 0.6   | share                                  | [42]      |
| $\text{CH}_4$ fraction in LFG                                    | 0.5   | share                                  | [42]      |
| Leachate generation                                              | 0.2   | $\text{g}/\text{g}_{\text{MSW}}$       | [45]      |
| P in leachate                                                    | 13.95 | $\text{mg}/\text{dm}^3$                | [44]      |
| N in leachate                                                    | 3.075 | $\text{mg}/\text{dm}^3$                | [44]      |
| Leachate density                                                 | 1000  | $\text{kg}/\text{m}^3$                 | Assumed   |
| Diesel use                                                       | 0.46  | $\text{dm}^3/\text{Mg}_{\text{MSW}}$   | [44]      |
| Emissions from diesel combustion (a bulldozer)                   |       |                                        |           |
| CO                                                               | 14    | $\text{g}/\text{dm}^3_{\text{diesel}}$ | [57]      |
| HC                                                               | 3.4   | $\text{g}/\text{dm}^3_{\text{diesel}}$ | [57]      |
| $\text{NO}_x$                                                    | 21    | $\text{g}/\text{dm}^3_{\text{diesel}}$ | [57]      |
| $\text{SO}_2$                                                    | 0.008 | $\text{g}/\text{dm}^3_{\text{diesel}}$ | [57]      |
| $\text{CO}_2\text{-eq. (CO}_2, \text{CH}_4, \text{N}_2\text{O)}$ | 2674  | $\text{g}/\text{dm}^3_{\text{diesel}}$ | [57]      |



**Table S5. Initial data for calculation of the methane generation potential**

| Waste fraction | DOC, kg <sub>C</sub> /kg <sub>waste</sub> | DOC <sub>f</sub> , share | L <sub>0</sub> , kg <sub>CH<sub>4</sub></sub> /kg <sub>waste</sub> |
|----------------|-------------------------------------------|--------------------------|--------------------------------------------------------------------|
| Paper          | 0.4                                       | 0.37                     | 0.059                                                              |
| Wood           | 0.43                                      | 0.21                     | 0.036                                                              |
| Food           | 0.15                                      | 0.64                     | 0.038                                                              |
| Textile        | 0.24                                      | 0.50                     | 0.048                                                              |
| Reference      | [87]                                      | [43]                     | Calculated                                                         |

**Table S6. Additional LCI data on landfilling with LFG collection**

| Parameter                      | Value | Unit                                        | Reference |
|--------------------------------|-------|---------------------------------------------|-----------|
| LFG collection rate            | 53    | %                                           | [48]      |
| LFG to flaring                 | 40    | % LFG collected                             | [44]      |
| Gas engine electric efficiency | 36    | %                                           | [44]      |
| Emissions from gas engine      |       |                                             |           |
| NO <sub>x</sub>                | 11.6  | g/Nm <sup>3</sup> <sub>CH<sub>4</sub></sub> | [49]      |
| CO                             | 8.46  | g/Nm <sup>3</sup> <sub>CH<sub>4</sub></sub> | [49]      |
| Emissions from flare device    |       |                                             |           |
| NO <sub>x</sub>                | 0.631 | g/Nm <sup>3</sup> <sub>CH<sub>4</sub></sub> | [49]      |
| CO                             | 0.737 | g/Nm <sup>3</sup> <sub>CH<sub>4</sub></sub> | [49]      |
| CH <sub>4</sub>                | 1     | % CH <sub>4</sub> input                     | [49]      |
| Efficiency of flaring          | 99    | %                                           | [44]      |

## 2.3 Data on MSW sorting facilities

**Table S7. Sorting facilities/processes modelled**

| Facility/process             | Scenario | MSW sorted,<br>Mg/a  | Materials separated |       |          |                   |                  |     | Reference |
|------------------------------|----------|----------------------|---------------------|-------|----------|-------------------|------------------|-----|-----------|
|                              |          |                      | Metals              | Glass | Plastics | Paper & cardboard | Screening reject | RDF |           |
| Saint Petersburg             |          |                      |                     |       |          |                   |                  |     |           |
| MPBO-2                       | all      | 169 000              | +                   | +     | +        | +                 | +                |     | [53]      |
| Staroobtyadcheskaya          | all      | 100 000              | +                   |       | +        | +                 | +                | +   | [34,46]   |
| Predportovaya                | all      | 100 000              | +                   |       | +        | +                 | +                | +   |           |
| TEK                          | all      | 56 302               | +                   | +     | +        | +                 |                  |     | [35,50]   |
| Sinergiya                    | all      | 41 386               | +                   | +     | +        | +                 |                  |     | [41]      |
| Leningrad region             |          |                      |                     |       |          |                   |                  |     |           |
| MSW sorting, screening incl. | all      | 18 496 <sup>1</sup>  | +                   | +     | +        | +                 | +                |     | [50,7]    |
| MSW sorting, screening excl. | all      | 65575 <sup>1</sup>   | +                   | +     | +        | +                 |                  |     |           |
| Gatchina plant               | 1-4      | 500 000 <sup>2</sup> | +                   |       | +        | +                 | +                | +   | [35]      |
| Kingisepp plant              | 1-4      | 300 000              | +                   | +     | +        | +                 | +                |     |           |

<sup>1</sup> Allocation of waste mass treated with and without screening of fine fraction is based on capacities of sorting plants which reported the presence of the screening process in the referenced source.

<sup>2</sup> MSW generated in Saint Petersburg is assumed to be sorted in Gatchina plant.

## 2.4 MSW sorting processes

**Table S8. LCI data on mechanical sorting of mixed waste**

| Parameter               | Value | Unit                       | Reference                                                                |
|-------------------------|-------|----------------------------|--------------------------------------------------------------------------|
| Electricity consumption | 70    | kWh/Mg <sub>MSW</sub>      | [88]                                                                     |
| Separation efficiencies |       |                            |                                                                          |
| ferrous metals          | 39.5  | % of initial fraction mass | Calculated based on recovery rates from [46] and data on MSW composition |
| aluminum cans           | 25.0  | % of initial fraction mass |                                                                          |
| plastics                | 36.2  | % of initial fraction mass |                                                                          |
| paper and cardboard     | 26.0  | % of initial fraction mass |                                                                          |
| screening reject        | 34.4  | % of input MSW             | [46]                                                                     |
| RDF                     | 25.0  | % of input MSW             | [46]                                                                     |

**Table S9. LCI data on a sorting line with manual separation of recyclable materials from mixed waste**

| Parameter               | Value          | Unit                       | Reference                                                                                           |
|-------------------------|----------------|----------------------------|-----------------------------------------------------------------------------------------------------|
| Electricity consumption |                |                            |                                                                                                     |
| screen included         | 4 <sup>1</sup> | kWh/Mg <sub>MSW</sub>      | Based on [64]                                                                                       |
| screen excluded         | 3 <sup>2</sup> | kWh/Mg <sub>MSW</sub>      | Based on [64]                                                                                       |
| Recovery rates          |                |                            |                                                                                                     |
| ferrous metals          | 39.5           | % of initial fraction mass | See in Table S8                                                                                     |
| aluminum cans           | 5.6            | % of initial fraction mass | Calculated based on recovery rates from [51] and an assumption that overall recovery rate equals 3% |
| plastics                | 2.5            | % of initial fraction mass |                                                                                                     |
| paper and cardboard     | 2.6            | % of initial fraction mass |                                                                                                     |
| glass                   | 5.7            | % of initial fraction mass |                                                                                                     |
| screening reject        | 34.4           | % of input MSW             | [46]                                                                                                |

<sup>1</sup> The value is obtained for assumed equipment (conveyor – 6 pcs, drum feeder – 1, trommel screen – 1, magnet – 1, one-way baler – 1, two-way baler – 1) using the methodology from [64]

<sup>2</sup> The value is obtained for assumed equipment (conveyor – 4 pcs, drum feeder – 1, magnet – 1, one-way baler – 1, two-way baler – 1) using the methodology from [64]

**Table S10. LCI data on a sorting line for source-separated waste fractions**

| Parameter               | Value           | Unit                                    | Reference     |
|-------------------------|-----------------|-----------------------------------------|---------------|
| Electricity consumption | 15 <sup>1</sup> | kWh/Mg <sub>MSW</sub>                   | Based on [64] |
| Separation efficiencies |                 |                                         |               |
| ferrous metals          | 100             | % of initial fraction mass <sup>2</sup> | [64]          |
| aluminum cans           | 100             | % of initial fraction mass <sup>2</sup> | [64]          |
| plastics                | 100             | % of initial fraction mass <sup>2</sup> | [64]          |
| paper and cardboard     | 100             | % of initial fraction mass <sup>2</sup> | [64]          |
| glass                   | 98              | % of initial fraction mass <sup>2</sup> | [64]          |

<sup>1</sup> The value is obtained according to the process flow given for source-separated materials sorting in [64] and using the methodology from [64]

<sup>2</sup> The initial fraction constitutes 70% of the flow leaving the other 30% as contaminants (mixed MSW)

## 2.5 Composting of organic fraction

**Table S11. LCI data on windrow composting**

| Parameter                                                                   | Value             | Unit                                 | Reference |
|-----------------------------------------------------------------------------|-------------------|--------------------------------------|-----------|
| Diesel need (windrow composting)                                            | 3                 | dm <sup>3</sup> /Mg <sub>waste</sub> | [56]      |
| Electricity need (rotary drum)                                              | 62                | kWh                                  | [40]      |
| Water need (rotary drum)                                                    | 13                | dm <sup>3</sup> /Mg <sub>waste</sub> | [40]      |
| Diesel need (curing after the drum)                                         | 0.71              | dm <sup>3</sup> /Mg <sub>waste</sub> | [55]      |
| C content of organic matter                                                 | 230 <sup>1</sup>  | g/kg                                 | [54]      |
| N content of organic matter                                                 | 7 <sup>1</sup>    | g/kg                                 | [54]      |
| C degradation rate                                                          | 66 <sup>1</sup>   | %                                    | [89]      |
| N degradation rate                                                          | 39 <sup>1</sup>   | %                                    | [54]      |
| Compost output                                                              | 60                | %                                    | [40]      |
| Direct emissions from composting                                            |                   |                                      |           |
| CH <sub>4</sub>                                                             | 1.5 <sup>1</sup>  | % degraded C                         | [54]      |
| N <sub>2</sub> O                                                            | 2 <sup>1</sup>    | % degraded N                         | [54]      |
| NH <sub>3</sub>                                                             | 83                | % degraded N                         | [56]      |
| NM VOC                                                                      | 2                 | g/kg wet waste                       | [56]      |
| Emissions from diesel combustion (wheel loader)                             |                   |                                      |           |
| CO                                                                          | 13                | g/dm <sup>3</sup> diesel             | [57]      |
| HC                                                                          | 3.0               | g/ dm <sup>3</sup> diesel            | [57]      |
| NO <sub>x</sub>                                                             | 17                | g/ dm <sup>3</sup> diesel            | [57]      |
| SO <sub>2</sub>                                                             | 0.008             | g/ dm <sup>3</sup> diesel            | [57]      |
| CO <sub>2</sub> -eq. (CO <sub>2</sub> , CH <sub>4</sub> , N <sub>2</sub> O) | 2673              | g/ dm <sup>3</sup> diesel            | [57]      |
| Mineral fertilizers substitution rates                                      |                   |                                      |           |
| N fertilizer                                                                | 2.85 <sup>1</sup> | g/kg <sub>waste treated</sub>        | [54]      |
| P fertilizer                                                                | 1.25 <sup>1</sup> | g/kg <sub>waste treated</sub>        | [54]      |
| K fertilizer                                                                | 3.90 <sup>1</sup> | g/kg <sub>waste treated</sub>        | [54]      |

<sup>1</sup> Averaged from the given interval

Share of organic matter in waste used in composting is calculated based on screening reject composition and organic content of source separated biowaste. Composition of screening reject is based on data from Staroobryadcheskaya sorting plant [46] (Table S12). Textile is

assumed to contain 50% of biodegradable material. Screening reject < 50 mm is assumed to contain three times more food, wood, paper, and textile waste than related percentages given in Table S12. In this case, biodegradable matter constitutes over 45% of “screening reject < 50 mm” and 60% of total screening reject. Such a share of organic matter corresponds to data from Di Lonardo et al. [90].

**Table S12. Composition of screening reject subject to composting [46]**

| Waste fraction          | Mass, Mg/a | Share, % |
|-------------------------|------------|----------|
| Food waste              | 4 200      | 12.2     |
| Paper                   | 930        | 2.7      |
| Cardboard               | 145        | 0.4      |
| Wood                    | 70         | 0.2      |
| Textile                 | 32         | 0.1      |
| Plastics                | 165        | 0.5      |
| Glass                   | 4 350      | 12.6     |
| Screening reject <50 mm | 23 570     | 68.4     |
| Other                   | 981        | 2.9      |
| Total                   | 34 443     | 100.0    |

Produced compost is assumed to be fully utilized. In case of soil substitution, since it is the thickness of the isolation layer that is regulated in landfill operation, the needed volume of compost or soil is the same. Soil and compost bulk densities are assumed to be 1600 kg/m<sup>3</sup> and 400 kg/m<sup>3</sup> respectively. Thus, excavation of 4 Mg or 2.5 m<sup>3</sup> of soil is avoided per each Mg of compost used.

Compost from source separated biowaste substitute N, P, and K fertilizers. Mineral fertilizers production is modelled using ecoinvent processes “market for inorganic nitrogen fertiliser, as N – RU”, “market for inorganic phosphorus fertiliser, as P<sub>2</sub>O<sub>5</sub> – RU”, “market for inorganic potassium fertiliser, as K<sub>2</sub>O – RU”. Data taken from the ecoinvent database refer to the “allocation, cut-off by classification” system model.

## **2.6 Anaerobic digestion of organic fraction**

Anaerobic digestion (AD) is only applied to the additional amount of organic waste which is separated according to the plan of the development of the system by 2024 (scenario 1), i.e. to source-separated organic fraction and screening reject from the new Gatchina and Kingisepp plants. Composition of screening reject used in AD is given in section 2.5.

Besides, AD process (“RoW: treatment of biowaste by anaerobic digestion”, cut-off system model) is applied only to organic part of waste subject to AD: contaminants are subtracted from the input flow.

Biogas combustion is modelled using unit process “RoW: heat and power co-generation, biogas, gas engine”, cut-off system model. Produced power and heat replace traditional production of power and heat in the region (see section 2.5.10 of the paper).

## 2.7 Recycling processes

**Table S13. Data used in modelling of recycling processes**

| Process/parameter         | Value                                                                                                   | Unit                                 | Reference              |
|---------------------------|---------------------------------------------------------------------------------------------------------|--------------------------------------|------------------------|
| Paper and cardboard       |                                                                                                         |                                      |                        |
| Recycling process         | <i>tissue paper production, RoW<sup>1</sup></i>                                                         |                                      | ecoinvent 3.7          |
| Substituted process       | <i>tissue paper production, virgin, GLO</i>                                                             |                                      | ecoinvent 3.7          |
| Substitution ratio        | 0.83                                                                                                    | kg virgin paper /kg recycled paper   | [91]                   |
| PET recycling             |                                                                                                         |                                      |                        |
| Recycling process         | <i>polyethylene terephthalate production, granulate, amorphous, recycled, RoW</i>                       |                                      | ecoinvent 3.7          |
| Substituted process       | <i>polyethylene terephthalate production, granulate, amorphous, RoW</i>                                 |                                      | ecoinvent 3.7          |
| Substitution ratio        | 0.81                                                                                                    | kg virgin PET /kg recycled PET       | [92]                   |
| HDPE recycling            |                                                                                                         |                                      |                        |
| Recycling process         | <i>polyethylene production, high density, granulate, recycled, RoW</i>                                  |                                      | ecoinvent 3.7          |
| Substituted process       | <i>polyethylene production, high density, granulate, RoW</i>                                            |                                      | ecoinvent 3.7          |
| Substitution ratio        | 0.75                                                                                                    | kg virgin HDPE /kg recycled HDPE     | [91]                   |
| Steel recycling           |                                                                                                         |                                      |                        |
| Credit for recycled steel | <i>GLO: Value of scrap worldsteel</i>                                                                   |                                      | GaBi database (2020.2) |
| Aluminium recycling       |                                                                                                         |                                      |                        |
| Recycling process         | <i>EU28+EFTA+Turkey: Aluminium remelting: wrought alloys ingot from scrap (2015) European Aluminium</i> |                                      | GaBi database (2020.2) |
| Substituted process       | <i>GLO: Aluminium ingot mix IAI (2010) IAI</i>                                                          |                                      | GaBi database (2020.2) |
| Substitution process      | <i>EU-15: Remelt aluminium ingots - credit (open loop) (includes substitution ratio equal to 69%)</i>   |                                      | GaBi database (2020.2) |
| Glass recycling           |                                                                                                         |                                      |                        |
| Recycling process         |                                                                                                         |                                      |                        |
| water need                | 0.2                                                                                                     | m <sup>3</sup> /Mg <sub>cullet</sub> | [60]                   |
| electricity need          | 551                                                                                                     | kWh/Mg <sub>cullet</sub>             | [59]                   |
| heat consumption          | 6963                                                                                                    | MJ/Mg <sub>cullet</sub>              | [59]                   |
| Substituted process       | <i>packaging glass production, green, without cullet, GLO</i>                                           |                                      | ecoinvent 3.7          |
| Substitution ratio        | 1                                                                                                       | kg virgin glass /kg recycled glass   | [92]                   |

<sup>1</sup> In this table and further italic text refers to unit processes from LCA software



## 2.8 Incineration of mixed MSW

Incineration process is modelled separately for several waste fractions using the following unit process from the GaBi database.

**Table S14. Processes from GaBi (version 2020.2) used in modelling of mixed MSW incineration**

| Waste fraction                               | Unit process used                                                                                                           |
|----------------------------------------------|-----------------------------------------------------------------------------------------------------------------------------|
| Biowaste                                     | <i>EU-28: Waste incineration of biodegradable waste fraction in municipal solid waste (MSW) ELCD/CEWEP &lt;p-agg&gt;</i>    |
| Paper and cardboard                          | <i>EU-28: Waste incineration of paper fraction in municipal solid waste (MSW) ELCD/CEWEP &lt;p-agg&gt;</i>                  |
| Metal                                        | <i>EU-28: Waste incineration of ferro metals ELCD/CEWEP &lt;p-agg&gt;</i>                                                   |
| Plastic                                      | <i>EU-28: Waste incineration of plastics (unspecified) fraction in municipal solid waste (MSW) ELCD/CEWEP &lt;p-agg&gt;</i> |
| Textile, leather, rubber                     | <i>EU-28: Waste incineration of textile fraction in municipal solid waste (MSW) ELCD/CEWEP &lt;p-agg&gt;</i>                |
| Wood                                         | <i>EU-28: Waste incineration of untreated wood (10.7% H<sub>2</sub>O content) ELCD/CEWEP &lt;p-agg&gt;</i>                  |
| Glass, inert waste, other waste <sup>1</sup> | <i>EU-28: Waste incineration of glass/inert material ELCD/CEWEP &lt;p-agg&gt;</i>                                           |

<sup>1</sup> Incineration of the “other waste” fraction received from the Leningrad region was modelled as if it is incineration of biowaste (50%) and textile (50%). Incineration of the “other waste” fraction received from Saint Petersburg was modelled as glass/inert material incineration.

## 2.9 RDF incineration

**Table S15. Composition of RDF and characteristics of RDF fractions**

| Waste fraction         | Content in RDF, % | Moisture content, %           | Carbon content, % |          | Fossil carbon content, % |          |
|------------------------|-------------------|-------------------------------|-------------------|----------|--------------------------|----------|
|                        |                   |                               | of TS             | of waste | of C                     | of waste |
| Paper, cardboard       | 42.7              | 10                            | 43                | 39       | 0                        | 0        |
| Plastics               | 33.6              | 1                             | 59                | 58       | 100                      | 58       |
| Liquid packaging board | 5.5               | 1 <sup>1</sup>                | 12 <sup>2</sup>   | 12       | 100                      | 12       |
| Textile                | 10.2              | 10                            | 56                | 50       | 50                       | 25       |
| Leather                | 3.2               | 5 <sup>3</sup>                | 51 <sup>3</sup>   | 48       | 50 <sup>4</sup>          | 24       |
| Rubber                 |                   | 0 <sup>3</sup>                | 65 <sup>3</sup>   | 65       | 50 <sup>4</sup>          | 33       |
| Wood                   | 4.8               | 1                             | 50                | 49       | 0                        | 0        |
| Reference              | [46]              | [93,94] if no other reference |                   |          |                          |          |

<sup>1</sup> Assumed equal to moisture content of plastic

<sup>2</sup> Assuming that plastic content in Tetra Pak equals 20%

<sup>3</sup> Values from [95]

<sup>4</sup> Assumed value

The report on municipal solid waste incineration plants shows that the most common practice of bottom and fly ashes handling in Russia is landfill disposal (both MSW and hazardous waste landfill are applied depending on the toxicity of residues) [96]. Therefore, in this study landfill disposal of bottom ash and fly ash are modelled.

**Table S16. LCI data on RDF incineration**

| Parameter                                        | Value                                   | Unit                              | Reference                     |
|--------------------------------------------------|-----------------------------------------|-----------------------------------|-------------------------------|
| LHV of RDF                                       | 15.9 <sup>1</sup>                       | MJ/kg <sub>RDF</sub>              | [61]                          |
| Bottom ash output                                | 15.7 <sup>1</sup>                       | % of RDF                          | [61]                          |
| Fly ash output                                   | 4                                       | % of RDF                          | [97]                          |
| Ashes disposal                                   | EU-28: Inert matter (Glass) on landfill |                                   | GaBi database (2020.2)        |
| Emissions from RDF incineration before treatment |                                         |                                   |                               |
| CO <sub>2</sub>                                  | 861                                     | g/kg <sub>RDF</sub>               | Calculated based on Table S15 |
| NO <sub>x</sub>                                  | 2.3                                     | g/kg <sub>RDF</sub>               | [44]                          |
| SO <sub>2</sub>                                  | 1.7                                     | g/kg <sub>RDF</sub>               | [44]                          |
| RDF utilization in a cement kiln                 |                                         |                                   |                               |
| LHV of coal                                      | 22.5                                    | MJ/kg                             | [98]                          |
| coal acquisition                                 | RU: Hard coal mix                       |                                   | GaBi database (2020.2)        |
| coal combustion                                  | RU: Process steam from hard coal 95%    |                                   | GaBi database (2020.2)        |
| RDF utilization in a boiler                      |                                         |                                   |                               |
| natural gas need (auxiliary fuel)                | 1.9                                     | m <sup>3</sup> /Mg <sub>RDF</sub> | [99]                          |
| natural gas supply                               | FI: Natural gas mix                     |                                   | GaBi database (2020.2)        |
| electricity production efficiency                | 22                                      | %                                 | [62]                          |

<sup>1</sup> Averaged from the given interval

<sup>1</sup> Averaged from the given interval

**Table S17. LCI data on flue gases treatment process**

| Parameter                                | Value                                                                                  | Unit                               | Reference              |
|------------------------------------------|----------------------------------------------------------------------------------------|------------------------------------|------------------------|
| Lime consumption of a scrubber           | 6                                                                                      | g/kg <sub>RDF</sub>                | [99]                   |
| Lime supply                              | <i>DE: Calcium hydroxide (Ca(OH)<sub>2</sub>; dry; slaked lime) (EN15804 A1-A3)</i>    |                                    | GaBi database (2020.2) |
| NH <sub>3</sub> consumption of SNCR unit | 2.75                                                                                   | g/kg <sub>RDF</sub>                | [99]                   |
| Ammonia supply                           | <i>EU-28: Ammonia (NH<sub>3</sub>) production mix, without CO<sub>2</sub> recovery</i> |                                    | GaBi database (2020.2) |
| Water consumption of APC                 | 0.5                                                                                    | dm <sup>3</sup> /kg <sub>RDF</sub> | [99]                   |
| Water supply                             | <i>EU-28: Process water</i>                                                            |                                    | GaBi database (2020.2) |
| NO <sub>x</sub> emission reduction       | 50                                                                                     | %                                  | [100]                  |
| SO <sub>2</sub> emission reduction       | 50                                                                                     | %                                  | [101]                  |
| APC residues amount                      | 5                                                                                      | % RDF input                        | [99]                   |

### 3 Sensitivity analysis

#### 3.1 Perturbation analysis

Normalized sensitivity ratios (NSR) are obtained following the approach described by Starostina et al. [27]. For each impact category, sensitivity ratios (SR) are normalized over the largest SR score among the scenarios so that the NSRs range between 0 and 1. NSR is calculated using the equation:

$$NSR_i^j = \frac{|SR_i^j|}{\max(SR_i^j)^j},$$

where  $i$  is a parameter, and  $j$  is an impact category. Thus, in a specific scenario and impact category, NSR values that are close to 1 represent parameters to which the LCIA results are most sensitive. NSR values are further weighted and aggregated among impact categories to identify the parameters that most affect the performance of the studied system.

Normalized sensitivity ratio values are further weighted and summed up among impact categories to identify parameters which affect the overall performance of the studied system the most. NSR are weighted according to the rules stated in Table S18. Weighted NSR values for each impact category is then aggregated so that overall values are obtained for each parameter in each scenario.

**Table S18. Weighting rules for NSR in perturbation analysis**

| Original NSR value | Weighted NSR value |
|--------------------|--------------------|
| <0.5               | 0                  |
| 0.5<NSR<0.8        | 0.8                |
| 0.8<NSR<0.9        | 0.9                |
| 0.9<NSR<1          | 1                  |

Perturbation analysis was performed for 8 parameters presented in Table S19. The results of perturbation analysis are presented further in Sections 4.1 and 4.2.

**Table S19. Parameters checked in perturbation analysis**

| Parameter                                                              | Initial value             |
|------------------------------------------------------------------------|---------------------------|
| LFG collection rate                                                    | 53%                       |
| Leachate generation                                                    | 0.2 g/g <sub>MSW</sub>    |
| Electric efficiency of RDF combustion                                  | 22%                       |
| LHV of RDF                                                             | 15.9 MJ/kg <sub>RDF</sub> |
| Recovery rate of source separated metal at sorting plant               | 100%                      |
| Recovery rate of source separated glass at sorting plant               | 98%                       |
| Recovery rate of source separated plastic at sorting plant             | 100%                      |
| Recovery rate of source separated paper and cardboard at sorting plant | 100%                      |

### 3.2 Impact of modelling choices: alternative data

Alternative MSW composition represents a weighted average data considering the population and composition of MSW from Kirovsky, Lomonosovsky and Tosnensky districts of Leningrad region.

**Table S20. Alternative data on MSW composition in Leningrad region [40]**

|                        |      |
|------------------------|------|
| Organic waste, %       | 28.0 |
| Paper and cardboard, % | 20.2 |
| Non-ferrous metals, %  | 1.0  |
| Ferrous metals, %      | 3.3  |
| Glass, %               | 11.7 |
| Plastics, %            | 6.4  |
| Leather, rubber, %     | 2.3  |
| Textile, %             | 7.2  |
| Wood, %                | 3.5  |
| Inert materials, %     | 3.2  |
| Other materials, %     | 13.2 |

## 4 Results

### 4.1 Perturbation analysis: sensitivity ratios

**Table S21. Sensitivity ratios of parameters in each scenario, GWP impact category**

|                                 | S0    | S1    | S2    | S3    | S4.1  | S4.2  |
|---------------------------------|-------|-------|-------|-------|-------|-------|
| LFG collection rate             | -0.22 | -0.28 | -0.76 | -1.50 | -7.57 | 64.75 |
| Leachate generation             | 0.00  | 0.00  | 0.00  | 0.00  | 0.00  | 0.00  |
| Electric eff. of RDF combustion | -0.04 | -0.14 | -0.19 | -0.44 | -1.95 | 16.69 |
| LHV of RDF                      | 0.00  | -0.08 | -0.11 | -0.26 | -1.15 | 9.83  |
| Recovery rate, metal            | 0.00  | 0.00  | 0.00  | 0.00  | -0.51 | 4.36  |
| Recovery rate, glass            | 0.00  | 0.00  | 0.00  | 0.00  | -1.59 | 13.62 |
| Recovery rate, plastic          | 0.00  | 0.00  | 0.00  | 0.00  | -4.18 | 35.73 |
| Recovery rate, paper&cardboard  | 0.00  | 0.00  | 0.00  | 0.00  | -1.87 | 16.01 |

**Table S22. Sensitivity ratios of parameters in each scenario, EP impact category**

|                                 | S0    | S1    | S2    | S3    | S4.1  | S4.2  |
|---------------------------------|-------|-------|-------|-------|-------|-------|
| LFG collection rate             | 0.22  | 0.14  | 0.24  | 0.60  | -0.04 | -0.03 |
| Leachate generation             | 0.23  | 0.12  | 0.11  | 0.21  | -0.01 | -0.01 |
| Electric eff. of RDF combustion | -0.29 | -0.54 | -0.47 | -1.38 | 0.07  | 0.06  |
| LHV of RDF                      | 0.00  | -0.35 | -0.31 | -0.90 | 0.05  | 0.04  |
| Recovery rate, metal            | 0.00  | 0.00  | 0.00  | 0.00  | 0.00  | 0.00  |
| Recovery rate, glass            | 0.00  | 0.00  | 0.00  | 0.00  | 0.04  | 0.03  |
| Recovery rate, plastic          | 0.00  | 0.00  | 0.00  | 0.00  | 0.97  | 0.75  |
| Recovery rate, paper&cardboard  | 0.00  | 0.00  | 0.00  | 0.00  | 0.37  | 0.28  |

**Table S23. Sensitivity ratios of parameters in each scenario, AP impact category**

|                                 | S0    | S1     | S2      | S3   | S4.1 | S4.2 |
|---------------------------------|-------|--------|---------|------|------|------|
| LFG collection rate             | 1.13  | -0.84  | -10.22  | 0.09 | 0.03 | 0.02 |
| Leachate generation             | 0.00  | 0.00   | 0.00    | 0.00 | 0.00 | 0.00 |
| Electric eff. of RDF combustion | 15.97 | -20.92 | -127.83 | 1.28 | 0.42 | 0.31 |
| LHV of RDF                      | 0.00  | -8.92  | -54.48  | 0.55 | 0.18 | 0.13 |
| Recovery rate, metal            | 0.00  | 0.00   | 0.00    | 0.00 | 0.02 | 0.01 |
| Recovery rate, glass            | 0.00  | 0.00   | 0.00    | 0.00 | 0.06 | 0.04 |
| Recovery rate, plastic          | 0.00  | 0.00   | 0.00    | 0.00 | 0.66 | 0.49 |
| Recovery rate, paper&cardboard  | 0.00  | 0.00   | 0.00    | 0.00 | 0.46 | 0.35 |

**Table S24. Sensitivity ratios of parameters in each scenario, ADP<sub>f</sub> impact category**

|                                 | S0   | S1   | S2   | S3   | S4.1 | S4.2 |
|---------------------------------|------|------|------|------|------|------|
| LFG collection rate             | 0.24 | 0.08 | 0.14 | 0.05 | 0.07 | 0.06 |
| Leachate generation             | 0.00 | 0.00 | 0.00 | 0.00 | 0.00 | 0.00 |
| Electric eff. of RDF combustion | 0.59 | 0.52 | 0.49 | 0.19 | 0.24 | 0.21 |
| LHV of RDF                      | 0.00 | 0.33 | 0.31 | 0.12 | 0.15 | 0.13 |
| Recovery rate, metal            | 0.00 | 0.00 | 0.00 | 0.00 | 0.04 | 0.04 |
| Recovery rate, glass            | 0.00 | 0.00 | 0.00 | 0.00 | 0.27 | 0.24 |
| Recovery rate, plastic          | 0.00 | 0.00 | 0.00 | 0.00 | 0.18 | 0.15 |
| Recovery rate, paper&cardboard  | 0.00 | 0.00 | 0.00 | 0.00 | 0.06 | 0.05 |

## 4.2 Perturbation analysis: normalized sensitivity ratios

**Table S25. Normalized sensitivity ratios of parameters in each scenario, GWP impact category**

|                                 | S0   | S1   | S2   | S3   | S4.1 | S4.2 |
|---------------------------------|------|------|------|------|------|------|
| LFG collection rate             | 0.00 | 0.00 | 0.01 | 0.02 | 0.12 | 1.00 |
| Leachate generation             | -    | -    | -    | -    | -    | -    |
| Electric eff. of RDF combustion | 0.00 | 0.01 | 0.01 | 0.03 | 0.12 | 1.00 |
| LHV of RDF                      | 0.00 | 0.01 | 0.01 | 0.03 | 0.12 | 1.00 |
| Recovery rate, metal            | 0.00 | 0.00 | 0.00 | 0.00 | 0.12 | 1.00 |
| Recovery rate, glass            | 0.00 | 0.00 | 0.00 | 0.00 | 0.12 | 1.00 |
| Recovery rate, plastic          | 0.00 | 0.00 | 0.00 | 0.00 | 0.12 | 1.00 |
| Recovery rate, paper&cardboard  | 0.00 | 0.00 | 0.00 | 0.00 | 0.12 | 1.00 |

**Table S26. Normalized sensitivity ratios of parameters in each scenario, EP impact category**

|                                 | S0   | S1   | S2   | S3   | S4.1 | S4.2 |
|---------------------------------|------|------|------|------|------|------|
| LFG collection rate             | 0.36 | 0.23 | 0.40 | 1.00 | 0.06 | 0.05 |
| Leachate generation             | 1.00 | 0.55 | 0.48 | 0.91 | 0.06 | 0.04 |
| Electric eff. of RDF combustion | 0.21 | 0.39 | 0.34 | 1.00 | 0.05 | 0.04 |
| LHV of RDF                      | 0.00 | 0.39 | 0.34 | 1.00 | 0.05 | 0.04 |
| Recovery rate, metal            | 0.00 | 0.00 | 0.00 | 0.00 | 1.00 | 0.78 |
| Recovery rate, glass            | 0.00 | 0.00 | 0.00 | 0.00 | 1.00 | 0.78 |
| Recovery rate, plastic          | 0.00 | 0.00 | 0.00 | 0.00 | 1.00 | 0.78 |
| Recovery rate, paper&cardboard  | 0.00 | 0.00 | 0.00 | 0.00 | 1.00 | 0.78 |



**Table S27. Normalized sensitivity ratios of parameters in each scenario, AP impact category**

|                                 | S0   | S1   | S2   | S3   | S4.1 | S4.2 |
|---------------------------------|------|------|------|------|------|------|
| LFG collection rate             | 0.11 | 0.08 | 1.00 | 0.01 | 0.00 | 0.00 |
| Leachate generation             | -    | -    | -    | -    | -    | -    |
| Electric eff. of RDF combustion | 0.12 | 0.16 | 1.00 | 0.01 | 0.00 | 0.00 |
| LHV of RDF                      | 0.00 | 0.16 | 1.00 | 0.01 | 0.00 | 0.00 |
| Recovery rate, metal            | 0.00 | 0.00 | 0.00 | 0.00 | 1.00 | 0.75 |
| Recovery rate, glass            | 0.00 | 0.00 | 0.00 | 0.00 | 1.00 | 0.75 |
| Recovery rate, plastic          | 0.00 | 0.00 | 0.00 | 0.00 | 1.00 | 0.75 |
| Recovery rate, paper&cardboard  | 0.00 | 0.00 | 0.00 | 0.00 | 1.00 | 0.75 |

**Table S28. Normalized sensitivity ratios of parameters in each scenario, ADP<sub>f</sub> impact category**

|                                 | S0   | S1   | S2   | S3   | S4.1 | S4.2 |
|---------------------------------|------|------|------|------|------|------|
| LFG collection rate             | 1.00 | 0.31 | 0.58 | 0.19 | 0.28 | 0.24 |
| Leachate generation             | -    | -    | -    | -    | -    | -    |
| Electric eff. of RDF combustion | 1.00 | 0.88 | 0.82 | 0.32 | 0.40 | 0.35 |
| LHV of RDF                      | 0.00 | 1.00 | 0.93 | 0.36 | 0.46 | 0.39 |
| Recovery rate, metal            | 0.00 | 0.00 | 0.00 | 0.00 | 1.00 | 0.86 |
| Recovery rate, glass            | 0.00 | 0.00 | 0.00 | 0.00 | 1.00 | 0.86 |
| Recovery rate, plastic          | 0.00 | 0.00 | 0.00 | 0.00 | 1.00 | 0.86 |
| Recovery rate, paper&cardboard  | 0.00 | 0.00 | 0.00 | 0.00 | 1.00 | 0.86 |

**Table S29. Aggregated weighted results of perturbation analysis over all impact categories. For each impact category, NSR is weighted as 0 when  $NSR < 0.5$ , 0.8 when  $0.5 < NSR < 0.8$ , 0.9 when  $0.8 < NSR < 0.9$  and 1 when  $0.9 < NSR < 1$**

|                                               | S0 | S1  | S2  | S3 | S4.1 | S4.2 |
|-----------------------------------------------|----|-----|-----|----|------|------|
| LFG collection rate                           | 1  | 0   | 1.8 | 1  | 0    | 1    |
| Leachate generation                           | 1  | 0.8 | 0   | 1  | 0    | 0    |
| RDF LHV                                       | 1  | 0.9 | 1.9 | 1  | 0    | 1    |
| RDF electric efficiency                       | 0  | 1   | 2   | 1  | 0    | 1    |
| Recovery rate <sup>1</sup> , metal            | 0  | 0   | 0   | 0  | 3    | 3.5  |
| Recovery rate <sup>1</sup> , plastic          | 0  | 0   | 0   | 0  | 3    | 3.5  |
| Recovery rate <sup>1</sup> , paper, cardboard | 0  | 0   | 0   | 0  | 3    | 3.5  |
| Recovery rate <sup>1</sup> , glass            | 0  | 0   | 0   | 0  | 3    | 3.5  |

<sup>1</sup> Recovery rates related to separation of source separated materials (S4)

According to the results, GWP has shown significant sensitivity to LFG collection rate in all scenarios. In scenario S0, GWP changes by 22% with 10% of LFG collection rate. As this study uses secondary data for this parameter, the magnitude of GWP may change substantially with the adoption of site-specific data. However, changes in scenario ranking are not expected since the parameter influences all scenarios. LHV of RDF appeared to be an important parameter that affects AP and ADP<sub>f</sub> the most. This parameter is also present in all scenarios so it can only affect the magnitude of impact scores. Lastly, the results are sensitive to the recovery rate of separately collected paper and cardboard fraction. Environmental impacts of scenario S4 may rise substantially with the decrease of the parameter.

### 4.3 Specific net impact potentials of processes involved in MSW management

**Table S30. Specific net impact potentials of processes for GWP, kg CO<sub>2</sub>-eq per kg of MSW handled in a relevant process**

|                               | S0    | S1    | S2    | S3    | S4.1  | S4.2  |
|-------------------------------|-------|-------|-------|-------|-------|-------|
| Collection, transportation    | 0.01  | 0.01  | 0.01  | 0.01  | 0.01  | 0.01  |
| Waste sorting                 | 0.01  | 0.02  | 0.02  | 0.02  | 0.01  | 0.01  |
| Landfilling                   | 0.37  | 0.35  | 0.25  | 0.18  | 0.20  | 0.20  |
| Steel recycling               | -1.62 | -1.62 | -1.62 | -1.62 | -1.62 | -1.62 |
| Aluminium recycling           | -10.4 | -10.4 | -10.4 | -10.4 | -10.4 | -10.4 |
| Plastic recycling             | -1.69 | -1.69 | -1.69 | -1.69 | -1.69 | -1.69 |
| Glass recycling               | -0.42 | -0.42 | -0.42 | -0.42 | -0.42 | -0.42 |
| Paper and cardboard recycling | -1.14 | -1.14 | -1.14 | -1.14 | -1.14 | -1.14 |
| Composting                    | 0.06  | 0.06  | 0.06  | 0.06  | 0.06  | 0.03  |
| Anaerobic digestion           | -     | -     | -     | -     | -     | -0.11 |
| RDF combustion                | -0.92 | 0.15  | 0.15  | 0.15  | 0.15  | 0.15  |
| Incineration                  | -0.09 | -0.09 | -0.09 | -0.01 | -0.10 | -0.10 |

**Table S31. Specific net impact potentials of processes for EP, kg PO<sub>4</sub><sup>3-</sup>-eq per kg of MSW handled in a relevant process**

|                               | S0        | S1        | S2        | S3        | S4.1      | S4.2      |
|-------------------------------|-----------|-----------|-----------|-----------|-----------|-----------|
| Collection, transportation    | 0.000003  | 0.000003  | 0.000003  | 0.000003  | 0.000004  | 0.000004  |
| Waste sorting                 | 0.000005  | 0.000007  | 0.000007  | 0.000007  | 0.000005  | 0.000005  |
| Landfilling                   | 0.000006  | 0.000007  | 0.000010  | 0.000012  | 0.000012  | 0.000012  |
| Steel recycling               | -0.000134 | -0.000134 | -0.000134 | -0.000134 | -0.000134 | -0.000134 |
| Aluminium recycling           | -0.004512 | -0.004512 | -0.004512 | -0.004512 | -0.004512 | -0.004512 |
| Plastic recycling             | -0.000422 | -0.000422 | -0.000422 | -0.000422 | -0.000422 | -0.000422 |
| Glass recycling               | -0.001006 | -0.001006 | -0.001006 | -0.001006 | -0.001006 | -0.001006 |
| Paper and cardboard recycling | -0.003728 | -0.003728 | -0.003728 | -0.003728 | -0.003728 | -0.003728 |
| Composting                    | 0.000392  | 0.000371  | 0.000371  | 0.000371  | 0.000395  | 0.000169  |
| Anaerobic digestion           | -         | -         | -         | -         | -         | -0.000035 |
| RDF combustion                | -0.000333 | -0.000101 | -0.000101 | -0.000101 | -0.000101 | -0.000101 |

|              |           |           |           |           |           |           |
|--------------|-----------|-----------|-----------|-----------|-----------|-----------|
| Incineration | -0.000048 | -0.000048 | -0.000048 | -0.000047 | -0.000051 | -0.000051 |
|--------------|-----------|-----------|-----------|-----------|-----------|-----------|

**Table S32. Specific net impact potentials of processes for AP, kg SO<sub>2</sub>-eq per kg of MSW handled in a relevant process**

|                            | S0       | S1       | S2       | S3       | S4.1     | S4.2     |
|----------------------------|----------|----------|----------|----------|----------|----------|
| Collection, transportation | 0.00001  | 0.00001  | 0.00001  | 0.00001  | 0.00002  | 0.00002  |
| Waste sorting              | 0.00008  | 0.00012  | 0.00012  | 0.00012  | 0.00009  | 0.00009  |
| Landfilling                | 0.00009  | 0.00011  | 0.00009  | 0.00015  | 0.00012  | 0.00012  |
| Steel recycling            | -0.00256 | -0.00256 | -0.00256 | -0.00256 | -0.00256 | -0.00256 |
| Aluminium recycling        | -0.07041 | -0.07041 | -0.07041 | -0.07041 | -0.07041 | -0.07041 |
| Plastic recycling          | -0.00259 | -0.00259 | -0.00259 | -0.00259 | -0.00259 | -0.00259 |
| Glass recycling            | -0.00595 | -0.00595 | -0.00595 | -0.00595 | -0.00595 | -0.00595 |
| Paper recycling            | -0.01203 | -0.01203 | -0.01203 | -0.01203 | -0.01203 | -0.01203 |
| Composting                 | 0.00182  | 0.00168  | 0.00168  | 0.00168  | 0.00178  | 0.00077  |
| Anaerobic digestion        | -        | -        | -        | -        | -        | -0.00039 |
| RDF combustion             | -0.01865 | -0.00413 | -0.00413 | -0.00413 | -0.00413 | -0.00413 |
| Incineration               | -0.00099 | -0.00099 | -0.00099 | -0.00084 | -0.00106 | -0.00106 |

**Table S33. Specific net impact potentials of processes for ADPr, MJ per kg of MSW handled in a relevant process**

|                            | S0    | S1    | S2    | S3    | S4.1  | S4.2  |
|----------------------------|-------|-------|-------|-------|-------|-------|
| Collection, transportation | 0.09  | 0.08  | 0.08  | 0.08  | 0.12  | 0.12  |
| Waste sorting              | 0.21  | 0.29  | 0.29  | 0.29  | 0.21  | 0.21  |
| Landfilling                | -0.07 | -0.08 | -0.16 | -0.21 | -0.20 | -0.20 |
| Steel recycling            | -15.5 | -15.5 | -15.5 | -15.5 | -15.5 | -15.5 |
| Aluminium recycling        | -97.1 | -97.1 | -97.1 | -97.1 | -97.1 | -97.1 |
| Plastic recycling          | -35.0 | -35.0 | -35.0 | -35.0 | -35.0 | -35.0 |
| Glass recycling            | -2.00 | -2.00 | -2.00 | -2.00 | -2.00 | -2.00 |
| Paper recycling            | -9.46 | -9.46 | -9.46 | -9.46 | -9.46 | -9.46 |
| Composting                 | 0.31  | 0.22  | 0.22  | 0.22  | 0.21  | 0.12  |
| Anaerobic digestion        | -     | -     | -     | -     | -     | -1.03 |
| RDF combustion             | -20.7 | -9.43 | -9.43 | -9.43 | -9.43 | -9.43 |

|              |       |       |       |       |       |       |
|--------------|-------|-------|-------|-------|-------|-------|
| Incineration | -6.71 | -6.71 | -6.71 | -5.56 | -7.26 | -7.26 |
|--------------|-------|-------|-------|-------|-------|-------|

#### 4.4 Life cycle impact assessment results

**Table S34. LCIA results in processes for GWP, kg CO<sub>2</sub>-eq/a**

|                            | S0        | S1        | S2        | S3        | S4.1      | S4.2      |
|----------------------------|-----------|-----------|-----------|-----------|-----------|-----------|
| Collection, transportation | 1.95E+07  | 1.79E+07  | 1.79E+07  | 1.78E+07  | 2.56E+07  | 2.56E+07  |
| Waste sorting              | 7.99E+06  | 2.71E+07  | 2.71E+07  | 2.71E+07  | 3.11E+07  | 3.11E+07  |
| Landfilling                | 1.05E+09  | 8.38E+08  | 6.16E+08  | 2.91E+08  | 3.75E+08  | 3.75E+08  |
| Steel recycling            | -8.31E+06 | -2.80E+07 | -2.80E+07 | -2.80E+07 | -4.87E+07 | -4.87E+07 |
| Aluminium recycling        | -1.70E+06 | -5.53E+06 | -5.53E+06 | -5.53E+06 | -2.19E+07 | -2.19E+07 |
| Plastic recycling          | -1.86E+07 | -6.17E+07 | -6.17E+07 | -6.17E+07 | -1.33E+08 | -1.33E+08 |
| Glass recycling            | -1.03E+06 | -2.16E+06 | -2.16E+06 | -2.16E+06 | -6.98E+07 | -6.98E+07 |
| Paper recycling            | -8.00E+06 | -2.59E+07 | -2.59E+07 | -2.59E+07 | -1.50E+08 | -1.50E+08 |
| Composting                 | 8.53E+06  | 2.27E+07  | 2.27E+07  | 2.27E+07  | 3.45E+07  | 1.73E+07  |
| Anaerobic digestion        | 0.00E+00  | 0.00E+00  | 0.00E+00  | 0.00E+00  | 0.00E+00  | -1.62E+04 |
| RDF combustion             | -2.31E+07 | 2.21E+07  | 2.21E+07  | 2.21E+07  | 2.21E+07  | 2.21E+07  |
| Incineration               | -5.84E+05 | -5.84E+05 | -5.84E+05 | -5.85E+06 | -6.52E+05 | -6.52E+05 |

**Table S35. LCIA results in processes for EP, kg PO<sub>4</sub><sup>3-</sup>-eq/a**

|                            | S0        | S1        | S2        | S3        | S4.1      | S4.2      |
|----------------------------|-----------|-----------|-----------|-----------|-----------|-----------|
| Collection, transportation | 1.02E+04  | 9.39E+03  | 9.39E+03  | 9.33E+03  | 1.34E+04  | 1.34E+04  |
| Waste sorting              | 2.62E+03  | 8.88E+03  | 8.88E+03  | 8.88E+03  | 1.02E+04  | 1.02E+04  |
| Landfilling                | 1.73E+04  | 1.60E+04  | 2.43E+04  | 1.92E+04  | 2.20E+04  | 2.20E+04  |
| Steel recycling            | -6.85E+02 | -2.31E+03 | -2.31E+03 | -2.31E+03 | -4.01E+03 | -4.01E+03 |
| Aluminium recycling        | -7.36E+02 | -2.39E+03 | -2.39E+03 | -2.39E+03 | -9.49E+03 | -9.49E+03 |
| Plastic recycling          | -4.66E+03 | -1.54E+04 | -1.54E+04 | -1.54E+04 | -3.33E+04 | -3.33E+04 |
| Glass recycling            | -2.49E+03 | -5.24E+03 | -5.24E+03 | -5.24E+03 | -1.69E+05 | -1.69E+05 |
| Paper recycling            | -2.62E+04 | -8.48E+04 | -8.48E+04 | -8.48E+04 | -4.93E+05 | -4.93E+05 |
| Composting                 | 5.23E+04  | 1.52E+05  | 1.52E+05  | 1.52E+05  | 2.35E+05  | 1.11E+05  |

|                     |           |           |           |           |           |           |
|---------------------|-----------|-----------|-----------|-----------|-----------|-----------|
| Anaerobic digestion | 0.00E+00  | 0.00E+00  | 0.00E+00  | 0.00E+00  | 0.00E+00  | -1.62E+04 |
| RDF combustion      | -8.33E+03 | -1.52E+04 | -1.52E+04 | -1.52E+04 | -1.52E+04 | -1.52E+04 |
| Incineration        | -3.11E+02 | -3.11E+02 | -3.11E+02 | -4.02E+04 | -3.27E+02 | -3.27E+02 |

**Table S36. LCIA results in processes for AP, kg SO<sub>2</sub>-eq/a**

|                            | S0        | S1        | S2        | S3        | S4.1      | S4.2      |
|----------------------------|-----------|-----------|-----------|-----------|-----------|-----------|
| Collection, transportation | 4.44E+04  | 4.07E+04  | 4.07E+04  | 4.05E+04  | 5.82E+04  | 5.82E+04  |
| Waste sorting              | 4.70E+04  | 1.60E+05  | 1.60E+05  | 1.60E+05  | 1.83E+05  | 1.83E+05  |
| Landfilling                | 2.58E+05  | 2.61E+05  | 2.25E+05  | 2.36E+05  | 2.28E+05  | 2.28E+05  |
| Steel recycling            | -1.31E+04 | -4.40E+04 | -4.40E+04 | -4.40E+04 | -7.67E+04 | -7.67E+04 |
| Aluminium recycling        | -1.15E+04 | -3.74E+04 | -3.74E+04 | -3.74E+04 | -1.48E+05 | -1.48E+05 |
| Plastic recycling          | -2.86E+04 | -9.48E+04 | -9.48E+04 | -9.48E+04 | -2.05E+05 | -2.05E+05 |
| Glass recycling            | -1.47E+04 | -3.10E+04 | -3.10E+04 | -3.10E+04 | -1.00E+06 | -1.00E+06 |
| Paper recycling            | -8.45E+04 | -2.74E+05 | -2.74E+05 | -2.74E+05 | -1.59E+06 | -1.59E+06 |
| Composting                 | 2.43E+05  | 6.88E+05  | 6.88E+05  | 6.88E+05  | 1.06E+06  | 5.04E+05  |
| Anaerobic digestion        | 0.00E+00  | 0.00E+00  | 0.00E+00  | 0.00E+00  | 0.00E+00  | -1.83E+05 |
| RDF combustion             | -4.66E+05 | -6.20E+05 | -6.20E+05 | -6.20E+05 | -6.20E+05 | -6.20E+05 |
| Incineration               | -6.35E+03 | -6.35E+03 | -6.35E+03 | -7.18E+05 | -6.77E+03 | -6.77E+03 |

**Table S37. LCIA results in processes for ADP<sub>f</sub>, MJ/a**

|                            | S0        | S1        | S2        | S3        | S4.1      | S4.2      |
|----------------------------|-----------|-----------|-----------|-----------|-----------|-----------|
| Collection, transportation | 2.75E+08  | 2.51E+08  | 2.51E+08  | 2.50E+08  | 3.60E+08  | 3.60E+08  |
| Waste sorting              | 1.14E+08  | 3.86E+08  | 3.86E+08  | 3.86E+08  | 4.43E+08  | 4.43E+08  |
| Landfilling                | -1.92E+08 | -1.86E+08 | -3.94E+08 | -3.38E+08 | -3.81E+08 | -3.81E+08 |
| Steel recycling            | -7.96E+07 | -2.68E+08 | -2.68E+08 | -2.68E+08 | -4.66E+08 | -4.66E+08 |
| Aluminium recycling        | -1.58E+07 | -5.15E+07 | -5.15E+07 | -5.15E+07 | -2.04E+08 | -2.04E+08 |
| Plastic recycling          | -3.87E+08 | -1.28E+09 | -1.28E+09 | -1.28E+09 | -2.77E+09 | -2.77E+09 |
| Glass recycling            | -4.96E+06 | -1.04E+07 | -1.04E+07 | -1.04E+07 | -3.37E+08 | -3.37E+08 |
| Paper recycling            | -6.64E+07 | -2.15E+08 | -2.15E+08 | -2.15E+08 | -1.25E+09 | -1.25E+09 |
| Composting                 | 4.09E+07  | 8.86E+07  | 8.86E+07  | 8.86E+07  | 1.27E+08  | 7.52E+07  |

|                     |           |           |           |           |           |           |
|---------------------|-----------|-----------|-----------|-----------|-----------|-----------|
| Anaerobic digestion | 0.00E+00  | 0.00E+00  | 0.00E+00  | 0.00E+00  | 0.00E+00  | -4.76E+08 |
| RDF combustion      | -5.18E+08 | -1.41E+09 | -1.41E+09 | -1.41E+09 | -1.41E+09 | -1.41E+09 |
| Incineration        | -4.31E+07 | -4.31E+07 | -4.31E+07 | -4.76E+09 | -4.66E+07 | -4.66E+07 |

## References

1. Ministry of Natural Resources and the Environment of the Russian Federation Passport of the National Project “Ecology” [Pasport Natsional’nogo Proyekta «Ekologiya»] Available online: [http://www.mnr.gov.ru/activity/directions/natsionalnyy\\_proekt\\_ekologiya/](http://www.mnr.gov.ru/activity/directions/natsionalnyy_proekt_ekologiya/) (accessed on Jul 1, 2020).
2. Waste Management Committee of the Leningrad Region Territorial Scheme for Waste Management, including Municipal Solid Waste Management [Territorial’naya skhema obrashcheniya s otkhodami, v tom chisle s tverdymi kommunal’nymi otkhodami] Available online: <https://waste.lenobl.ru/ru/deiatelnost/tershema/> (accessed on Jul 2, 2020).
3. Committee for the Improvement of Saint Petersburg Territorial production and consumption waste management scheme [Territorialnaya skhema obrashcheniya s otkhodami proizvodstva i potrebleniya] Available online: [https://www.gov.spb.ru/gov/otrasl/blago/documents/new\\_npa/](https://www.gov.spb.ru/gov/otrasl/blago/documents/new_npa/) (accessed on Jun 25, 2020).
4. Administration of St. Petersburg Conclusion dated 17.02.2020 No. 01-12-6 20-0-0 [Заключение от 17.02.2020 № 01-12-6 20-0-0] Available online: <https://www.gov.spb.ru/gov/otrasl/blago/documents/obshestvennoe-obsuzhdenie-proektov-normativnyh-pravovyh-aktov/zaklyuchenie-ot-17022020-01-12-6-20-0-0/> (accessed on Feb 17, 2021).
5. IPCC CH<sub>4</sub> Emissions from Solid Waste Disposal. *IPCC Good Pract. Guid. Uncertain. Manag. Natl. Greenh. Gas Invent.* **2006**, 419–439.
6. Havukainen, J.; Zhan, M.; Dong, J.; Liikanen, M.; Deviatkin, I.; Li, X.; Horttanainen, M. Environmental impact assessment of municipal solid waste management incorporating mechanical treatment of waste and incineration in Hangzhou, China. *J.*



*Clean. Prod.* **2017**, *141*, 453–461, doi:10.1016/j.jclepro.2016.09.146.

7. Liikanen, M.; Havukainen, J.; Viana, E.; Horttanainen, M. Steps towards more environmentally sustainable municipal solid waste management – A life cycle assessment study of São Paulo, Brazil. *J. Clean. Prod.* **2018**, *196*, 150–162, doi:10.1016/j.jclepro.2018.06.005.
8. LIPASTO Average emissions and energy use of working machines per fuel in Finland in 2016 Available online: <http://lipasto.vtt.fi/yksikkopaastot/indexe.htm> (accessed on Jul 21, 2020).
9. IPCC Guidelines for National Greenhouse Gas Inventories. Volume 5. Waste Available online: <https://www.ipcc-nggip.iges.or.jp/public/2006gl/vol5.html> (accessed on Nov 5, 2020).
10. Lee, U.; Han, J.; Wang, M. Evaluation of landfill gas emissions from municipal solid waste landfills for the life-cycle analysis of waste-to-energy pathways. *J. Clean. Prod.* **2017**, *166*, 335–342, doi:10.1016/j.jclepro.2017.08.016.
11. Doka, G. Landfills. Underground Deposits. Landfarming Available online: [https://www.doka.ch/13\\_III\\_Landfills.pdf](https://www.doka.ch/13_III_Landfills.pdf) (accessed on Nov 5, 2020).
12. Bacchi, D.; Bacci, R.; Ferrara, G.; Lombardi, L.; Pecorini, I.; Rossi, E. Life Cycle Assessment (LCA) of landfill gas management: Comparison between conventional technologies and microbial oxidation systems. *Energy Procedia* **2018**, *148*, 1066–1073, doi:10.1016/j.egypro.2018.08.053.
13. MPBO-2 Investment program of the St. Petersburg State Unitary Enterprise “Plant for mechanized processing of household waste” in the field of solid waste management for 2019-2023 [Investitsionnaya programma Sankt-Peterburgskogo gosudarstvennogo unitarnogo predpr Available online: <https://mpbo2.ru/standarty-raskrytiya-informacii-dok/> (accessed on Sep 23, 2020).

14. ООО "KOSMOS " Correction of the project "Landfill for solid household and construction waste in the village of M. Zamostye, Gatchina district Leningrad region " [Korrektirovka proyekta "Poligon tverdykh bytovykh i stroitel'nykh otkhodov v d. M.Zamostje Gatchinskogo rai Available online: [https://www.google.com/url?sa=t&rct=j&q=&esrc=s&source=web&cd=&ved=2ahUKEwi85MyftbrtAhXBAXAIHYitCx8QFjAAegQIAxAC&url=http%3A%2F%2Fadm.gtn.ru%2F\\_file%2Fnews%2F323abe34eba78b10333e3bac779180c2.doc&usg=AOvVaw2drnFzsr9QsJAsc6TZKGDu](https://www.google.com/url?sa=t&rct=j&q=&esrc=s&source=web&cd=&ved=2ahUKEwi85MyftbrtAhXBAXAIHYitCx8QFjAAegQIAxAC&url=http%3A%2F%2Fadm.gtn.ru%2F_file%2Fnews%2F323abe34eba78b10333e3bac779180c2.doc&usg=AOvVaw2drnFzsr9QsJAsc6TZKGDu) (accessed on Jul 12, 2020).
15. АО "Avtopark №1 "Spetstrans " Interview data and data received afterwards on 21.09.2021 2021.
16. Rospotrebnadzor The register of sanitary and epidemiological conclusions on the compliance (non-compliance) of activities (works, services) with the requirements of state sanitary and epidemiological rules and regulations [Reyestr sanitarno-epidemiologicheskikh zaklyuche Available online: <http://fp.crc.ru/service/?oper=s&uinz=%29F%29%28%2CJNc4fM&pdk=on&pril=on> (accessed on Mar 9, 2020).
17. Federal Department of State statistics Database of indicators of municipalities [Baza dannykh pokazateley munutsipalnykh obrazavaniy] Available online: <https://rosstat.gov.ru/dbscripts/munst/munst41/DBInet.cgi> (accessed on Jun 14, 2020).
18. Nasrullah, M.; Vainikka, P.; Hannula, J.; Hurme, M.; Kärki, J. Mass, energy and material balances of SRF production process. Part 3: Solid recovered fuel produced from municipal solid waste. *Waste Manag. Res.* **2015**, *33*, 146–156, doi:10.1177/0734242X14563375.
19. Pressley, P.N.; Levis, J.W.; Damgaard, A.; Barlaz, M.A.; DeCarolis, J.F. Analysis of material recovery facilities for use in life-cycle assessment. *Waste Manag.* **2015**, *35*, 307–317, doi:10.1016/j.wasman.2014.09.012.

20. Il'inykh, G.V.; Ustyantsev, E.A.; Vaisman, Y.I. Construction of the material balance of the line for manual sorting of solid household waste [Postroyeniye material'nogo balansa linii ruchnoy sortirovki tverdykh bytovykh otkhodov]. **2013**, 22–25, doi:10.18412/1816-0395-2013-1-22-25.
21. Lima, P.D.M.; Colvero, D.A.; Gomes, A.P.; Wenzel, H.; Schalch, V.; Cimpan, C. Environmental assessment of existing and alternative options for management of municipal solid waste in Brazil. *Waste Manag.* **2018**, 78, 857–870, doi:10.1016/j.wasman.2018.07.007.
22. AO "DAR/VODGEO " Construction of a complex for the processing and disposal of St. Petersburg waste in the Lyubanskoye forestry of the Tosnensky municipal district of the Leningrad region. Project documentation. Environmental impact assessment Available online: <http://www.infoeco.ru/assets/images/poligon/233-OBOC.pdf> (accessed on Jun 13, 2020).
23. Grzesik, K.; Malinowski, M. Life Cycle Assessment of Mechanical-Biological Treatment of Mixed Municipal Waste. *Environ. Eng. Sci.* **2017**, 34, 207–220, doi:10.1089/ees.2016.0284.
24. Boldrin, A.; Andersen, J.K.; Møller, J.; Christensen, T.H.; Favoino, E. Composting and compost utilization: Accounting of greenhouse gases and global warming contributions. *Waste Manag. Res.* **2009**, 27, 800–812, doi:10.1177/0734242X09345275.
25. Ham, R.K.; Komilis, D. A Laboratory Study to Investigate Gaseous Emissions and Solids Decomposition During Composting of Municipal Solid Waste. **2003**, 149.
26. Di Lonardo, M.C.; Lombardi, F.; Gavasci, R. Characterization of MBT plants input and outputs: A review. *Rev. Environ. Sci. Biotechnol.* **2012**, 11, 353–363, doi:10.1007/s11157-012-9299-2.
27. Gala, A.B.; Raugai, M.; Fullana-i-Palmer, P. Introducing a new method for calculating

- the environmental credits of end-of-life material recovery in attributional LCA. *Int. J. Life Cycle Assess.* **2015**, *20*, 645–654, doi:10.1007/s11367-015-0861-3.
28. Rigamonti, L.; Grosso, M.; Giugliano, M. Life cycle assessment of sub-units composing a MSW management system. *J. Clean. Prod.* **2010**, *18*, 1652–1662, doi:10.1016/j.jclepro.2010.06.029.
  29. Landi, D.; Germani, M.; Marconi, M. Analyzing the environmental sustainability of glass bottles reuse in an Italian wine consortium. In *Proceedings of the Procedia CIRP*; Elsevier B.V., 2019; Vol. 80, pp. 399–404.
  30. Greene, J. Energy implications of glass-container recycling. *Hosp. Heal. Networks* **2007**, *81*, 65–69, doi:10.12968/sece.2008.6.1230.
  31. Finnveden, G.; Johansson, J.; Lind, P.; Moberg, Å. Life Cycle Assessments of Energy from Solid Waste Available online: <http://citeseerx.ist.psu.edu/viewdoc/download?doi=10.1.1.197.4254&rep=rep1&type=pdf> (accessed on Nov 26, 2020).
  32. Bjarnadóttir, H.J.; Friðriksson, G.B.; Johnsen, T.; Sletsen, H. Guidelines for the use of LCA in the waste management sector Available online: <http://www.nordtest.org/register/techn/tlibrary/tec517/tec517.pdf> (accessed on Nov 6, 2020).
  33. Larionov, K.B.; Tsibulskiy, S.A.; Slyusarskiz, K. V.; Tolokolnikov, A.A.; Gubin, V.E. Study of the physical-chemical characteristics of non-food solid waste combustion. *J. Phys. Conf. Ser.* **2019**, *1359*, doi:10.1088/1742-6596/1359/1/012065.
  34. EkoSPES Waste incineration plants and incinerators in the Russian Federation [Musoroszhigatel'nyye zavody i insineratory v Rossiyskoy Federatsii] Available online: [http://www.ecoaccord.org/news2020/O63op 15.06.2020.pdf](http://www.ecoaccord.org/news2020/O63op%2015.06.2020.pdf) (accessed on Aug 24, 2020).

35. Bushikhin, V.V.; Lomtev, A.Y.; Budko, A.G.; Pakhtinov, V.. Alternative fuel from solid household waste [Alternativnoe toplivo iz tverdikh bitovikh otkhodov] Available online: [http://www.atr-sz.ru/files/visual/2015\\_04\\_29/alt\\_fuel.pdf](http://www.atr-sz.ru/files/visual/2015_04_29/alt_fuel.pdf) (accessed on Oct 2, 2020).
36. Consonni, S.; Giugliano, M.; Grosso, M. Alternative strategies for energy recovery from municipal solid waste: Part A: Mass and energy balances. In Proceedings of the Waste Management; Elsevier Ltd, 2005; Vol. 25, pp. 123–135.
37. Małkowski, P. The quality of coal in Poland, Russia and Ukraine and its effect on dust emission into the atmosphere during combustion. *Czas. Tech.* **2018**, *9*, 141–161, doi:10.4467/2353737xct.18.138.8977.
38. Astrup, T.; Møller, J.; Fruergaard, T. Incineration and co-combustion of waste: Accounting of greenhouse gases and global warming contributions. *Waste Manag. Res.* **2009**, *27*, 789–799, doi:10.1177/0734242X09343774.
39. Kourkoumpas, D.S.; Karellas, S.; Kouloumoundras, S.; Koufodimos, G.; Grammelis, P.; Kakaras, E. Comparison of waste-to-energy processes by means of life cycle analysis principles regarding the global warming potential impact: Applied case studies in greece, france and germany. *Waste and Biomass Valorization* **2015**, *6*, 605–621, doi:10.1007/s12649-015-9367-2.
40. Zandaryaa, S.; Gavasci, R.; Lombardi, F.; Fiore, A. Nitrogen oxides from waste incineration: Control by selective non-catalytic reduction. In Proceedings of the Chemosphere; Pergamon, 2001; Vol. 42, pp. 491–497.
41. Liu, Z.S. Advanced experimental analysis of the reaction of  $\text{Ca}(\text{OH})_2$  with HCl and  $\text{SO}_2$  during the spray dry scrubbing process. *Fuel* **2005**, *84*, 5–11, doi:10.1016/j.fuel.2004.07.004.
42. Starostina, V.; Damgaard, A.; Eriksen, M.K.; Christensen, T.H. Waste management in the Irkutsk region, Siberia, Russia: An environmental assessment of alternative

development scenarios. *Waste Manag. Res.* **2018**, *36*, 373–385, doi:10.1177/0734242X18757627.
